# Supplementary material for: Quantitative Proteomic Analysis on the Slightly Acidic Electrolyzed Water Triggered Viable but Non-Culturable Listeria monocytogenes
Source: MDPI journal article supplement (doi:10.3390/ijms241310616), 2023-06-25
Supplement: s1 [file s1]

**Table S1.** The up-regulated proteins of *L. monocytogenes* after treatment with slightly acidic electrolyzed water in different chlorine concentrations. Note: SA20, 20 mg/L of SAEW; SA10, 10 mg/L of SAEW; C, control. The mark “#” is fold change ( $\log_2$ ) > 1,  $p < 0.05$ .

| Protein IDs | Name (recommend name)                                 | Entry Name   | Gene name | Locus   | Fold change ( $\log_2$ ) |                    |
|-------------|-------------------------------------------------------|--------------|-----------|---------|--------------------------|--------------------|
|             |                                                       |              |           |         | SA20_CTL                 | SA10_CTL           |
| P66401      | 30S ribosomal protein S14 type Z                      | RS14Z_LISMO  | rpsZ      | lmo2619 | 2.977 <sup>#</sup>       | 2.746 <sup>#</sup> |
| P0A491      | 50S ribosomal protein L35                             | RL35_LISMO   | rpmI      | lmo1784 | 2.291 <sup>#</sup>       | 2.187 <sup>#</sup> |
| P67288      | UPF0154 protein lmo1306                               | Y1306_LISMO  | lmo1306   | lmo1306 | 1.804 <sup>#</sup>       | 1.702 <sup>#</sup> |
| Q7AP57      | Glycine betaine transporter BetL                      | Q7AP57_LISMO | betL      | lmo2092 | 1.797 <sup>#</sup>       | 1.671 <sup>#</sup> |
| Q8Y491      | Probable tautomerase lmo2564                          | Y2564_LISMO  | lmo2564   | lmo2564 | 1.652 <sup>#</sup>       | 1.801 <sup>#</sup> |
| Q8Y443      | 50S ribosomal protein L24                             | RL24_LISMO   | rplX      | lmo2621 | 1.528 <sup>#</sup>       | 1.300 <sup>#</sup> |
| Q927M5      | 50S ribosomal protein L30                             | RL30_LISMO   | rpmD      | lmo2614 | 1.339 <sup>#</sup>       | 1.314 <sup>#</sup> |
| P66103      | 50S ribosomal protein L20                             | RL20_LISMO   | rplT      | lmo1783 | 1.311 <sup>#</sup>       | 1.153 <sup>#</sup> |
| Q8Y447      | 50S ribosomal protein L15                             | RL15_LISMO   | rplO      | lmo2613 | 1.041 <sup>#</sup>       | 1.019 <sup>#</sup> |
| Q8Y3I1      | Ribonuclease P protein component                      | RNPA_LISMO   | rnpA      | lmo2855 | 1.033 <sup>#</sup>       | 1.331 <sup>#</sup> |
| P0A4Q8      | UPF0145 protein lmo0208                               | Y208_LISMO   | lmo0208   | lmo0208 | 0.974                    | 1.098 <sup>#</sup> |
| Q8Y853      | UPF0637 protein lmo1065                               | Y1065_LISMO  | lmo1065   | lmo1065 | 0.953                    | 0.891              |
| Q8Y9C1      | FMN-dependent NADH:quinone oxidoreductase 1           | AZOR1_LISMO  | azoR1     | lmo0611 | 0.919                    | 0.776              |
| Q8Y6C6      | Phosphoribosylamine--glycine ligase                   | PUR2_LISMO   | purD      | lmo1764 | 0.913                    | 0.967              |
| Q8YAB4      | 2-C-methyl-D-erythritol 2,4-cyclodiphosphate synthase | ISPF_LISMO   | ispF      | lmo0236 | 0.857                    | 0.689              |

**Table S1.** continued.

| Protein IDs | Name (recommend name)                      | Entry Name  | Gene name | Locus   | Fold change (log <sub>2</sub> ) |          |
|-------------|--------------------------------------------|-------------|-----------|---------|---------------------------------|----------|
|             |                                            |             |           |         | SA20_CTL                        | SA10_CTL |
| Q92BL2      | UPF0473 protein lmo1501                    | Y1501_LISMO | lmo1501   | lmo1501 | 0.832                           | 0.648    |
| Q8Y5E4      | Diadenylate cyclase                        | DACA_LISMO  | dacA      | lmo2120 | 0.770                           | 0.800    |
| P60426      | 50S ribosomal protein L2                   | RL2_LISMO   | rplB      | lmo2629 | 0.734                           | 0.608    |
| P66484      | 30S ribosomal protein S19                  | RS19_LISMO  | rpsS      | lmo2628 | 0.725                           | 0.600    |
| Q8Y556      | 3'-5' exoribonuclease YhaM                 | YHAM_LISMO  | yhaM      | lmo2220 | 0.717                           | 0.672    |
| Q927L9      | 50S ribosomal protein L5                   | RL5_LISMO   | rplE      | lmo2620 | 0.717                           | 0.696    |
| Q8Y458      | 50S ribosomal protein L13                  | RL13_LISMO  | rplM      | lmo2597 | 0.704                           | 0.575    |
| Q8YAR8      | Single-stranded DNA-binding protein 1      | SSB1_LISMO  | ssb1      | lmo0045 | 0.687                           | 0.706    |
| P66860      | SsrA-binding protein                       | SSRP_LISMO  | smpB      | lmo2448 | 0.686                           | 0.553    |
| Q8Y753      | Glycine--tRNA ligase alpha subunit         | SYGA_LISMO  | glyQ      | lmo1459 | 0.655                           | 0.563    |
| Q8Y723      | Putative pre-16S rRNA nuclease             | YQGF_LISMO  | lmo1502   | lmo1502 | 0.649                           | 0.635    |
| P64032      | Elongation factor P                        | EFP_LISMO   | efp       | lmo1355 | 0.649                           | 0.594    |
| P63439      | Acyl carrier protein                       | ACP_LISMO   | acpP      | lmo1806 | 0.643                           | 0.593    |
| Q8Y4G1      | HPr kinase/phosphorylase                   | HPRK_LISMO  | hprK      | lmo2483 | 0.623                           | 0.529    |
| Q8Y450      | 50S ribosomal protein L17                  | RL17_LISMO  | rplQ      | lmo2605 | 0.603                           | 0.550    |
| Q8Y7C6      | Transcription antitermination protein NusB | NUSB_LISMO  | nusB      | lmo1359 | 0.540                           | 0.466    |

**Table S1.** continued.

| Protein IDs | Name (recommend name)                                        | Entry Name  | Gene name | Locus   | Fold change (log <sub>2</sub> ) |          |
|-------------|--------------------------------------------------------------|-------------|-----------|---------|---------------------------------|----------|
|             |                                                              |             |           |         | SA20_CTL                        | SA10_CTL |
| Q8Y5S8      | Ribonuclease Z                                               | RNZ_LISMO   | rnz       | lmo1977 | 0.537                           | 0.401    |
| Q8Y445      | 50S ribosomal protein L18                                    | RL18_LISMO  | rplR      | lmo2616 | 0.520                           | 0.376    |
| P66330      | 30S ribosomal protein S10                                    | RS10_LISMO  | rpsJ      | lmo2633 | 0.518                           | 0.334    |
| P28764      | Superoxide dismutase [Mn]                                    | SODM_LISMO  | sodA      | lmo1439 | 0.500                           | 0.531    |
| Q8Y454      | Energy-coupling factor transporter ATP-binding protein EcfA1 | ECFA1_LISMO | ecfA1     | lmo2601 | 0.489                           | 0.442    |
| Q8Y866      | Peptide deformylase                                          | DEF_LISMO   | def       | lmo1051 | 0.489                           | 0.458    |
| P66352      | 30S ribosomal protein S11                                    | RS11_LISMO  | rpsK      | lmo2607 | 0.480                           | 0.308    |
| Q8Y5X4      | Nucleoside diphosphate kinase                                | NDK_LISMO   | ndk       | lmo1929 | 0.473                           | 0.383    |
| Q8Y4G3      | Pyrophosphatase PpaX                                         | PPAX_LISMO  | ppaX      | lmo2481 | 0.466                           | 0.455    |
| Q8YA46      | Hydroxyethylthiazole kinase                                  | THIM_LISMO  | thiM      | lmo0316 | 0.455                           | 0.338    |
| Q8Y788      | DNA mismatch repair protein MutL                             | MUTL_LISMO  | mutL      | lmo1404 | 0.451                           | 0.422    |
| Q8YAC7      | Bifunctional protein TilS/HprT                               | TILS_LISMO  | tilS/hprT | lmo0219 | 0.448                           | 0.363    |
| P66383      | 30S ribosomal protein S13                                    | RS13_LISMO  | rpsM      | lmo2608 | 0.421                           | 0.420    |
| Q8Y708      | Histidine--tRNA ligase                                       | SYH_LISMO   | hisS      | lmo1520 | 0.419                           | 0.346    |
| Q8Y8C0      | Peptide chain release factor 3                               | RF3_LISMO   | prfC      | lmo0988 | 0.395                           | 0.347    |

**Table S1.** continued.

| Protein IDs | Name (recommend name)                                              | Entry Name  | Gene name | Locus   | Fold change (log <sub>2</sub> ) |          |
|-------------|--------------------------------------------------------------------|-------------|-----------|---------|---------------------------------|----------|
|             |                                                                    |             |           |         | SA20_CTL                        | SA10_CTL |
| Q8Y6C0      | Phosphoribosylformylglycinamidine synthase subunit PurQ            | PURQ_LISMO  | purQ      | lmo1770 | 0.394                           | 0.286    |
| Q8Y5W6      | Cytidylate kinase                                                  | KCY_LISMO   | cmk       | lmo1939 | 0.391                           | 0.316    |
| Q8Y6X2      | Threonine--tRNA ligase                                             | SYT_LISMO   | thrS      | lmo1559 | 0.371                           | 0.389    |
| Q8Y7K1      | Methylenetetrahydrofolate--tRNA-(uracil-5-)-methyltransferase TrmF | TRMFO_LISMO | trmFO     | lmo1276 | 0.324                           | 0.417    |
| P61055      | 50S ribosomal protein L4                                           | RL4_LISMO   | rplD      | lmo2631 | 0.323                           | 0.201    |
| Q8Y6T6      | 30S ribosomal protein S4                                           | RS4_LISMO   | rpsD      | lmo1596 | 0.321                           | 0.254    |
| Q9ZIM1      | Uncharacterized protein Lmo0216                                    | Y216_LISMO  | lmo0216   | lmo0216 | 0.314                           | 0.252    |
| Q8YAR2      | 50S ribosomal protein L9                                           | RL9_LISMO   | rplI      | lmo0053 | 0.302                           | 0.247    |
| Q8Y8P1      | D-alanine--D-alanine ligase                                        | DDL_LISMO   | ddl       | lmo0855 | 0.300                           | 0.251    |
| Q8Y729      | 5'-methylthioadenosine/S-adenosylhomocysteine nucleosidase         | MTNN_LISMO  | mtnN      | lmo1494 | 0.298                           | 0.222    |
| Q8Y3Y6      | Thymidylate kinase                                                 | KTHY_LISMO  | tmk       | lmo2693 | 0.296                           | 0.226    |
| Q8Y8K6      | Serine-protein kinase RsbW                                         | RSBW_LISMO  | rsbW      | lmo0894 | 0.292                           | 0.208    |
| Q48762      | Uncharacterized PIN and TRAM-domain containing protein Lmo0234     | Y234_LISMO  | lmo0234   | lmo0234 | 0.288                           | 0.231    |
| Q8Y653      | Manganese-binding lipoprotein MntA                                 | MNTA_LISMO  | mntA      | lmo1847 | 0.268                           | 0.220    |
| Q8Y4D8      | Peptide chain release factor 2                                     | RF2_LISMO   | prfB      | lmo2509 | 0.257                           | 0.245    |

**Table S1.** continued.

| Protein IDs | Name (recommend name)                           | Entry Name   | Gene name | Locus   | Fold change (log <sub>2</sub> ) |          |
|-------------|-------------------------------------------------|--------------|-----------|---------|---------------------------------|----------|
|             |                                                 |              |           |         | SA20_CTL                        | SA10_CTL |
| Q8Y5Z7      | Methylglyoxal synthase                          | MGSA_LISMO   | mgsA      | lmo1906 | 0.206                           | 0.187    |
| Q8YAE2      | Ribosomal RNA small subunit methyltransferase A | RSMA_LISMO   | rsmA      | lmo0188 | 0.198                           | 0.224    |
| Q8Y5Y0      | 3-phosphoshikimate 1-carboxyvinyltransferase    | AROA_LISMO   | aroA      | lmo1923 | 0.178                           | 0.215    |
| O69192      | Aminopeptidase C                                | PEPC_LISMO   | pepC      | lmo2338 | 0.154                           | 0.127    |
| Q8Y4C1      | ATP synthase subunit beta 2                     | ATPB2_LISMO  | atpD2     | lmo2529 | 0.093                           | 0.072    |
| Q8Y6Z3      | GTPase Obg                                      | OBG_LISMO    | obg       | lmo1537 | 0.086                           | 0.148    |
| P66054      | 50S ribosomal protein L11                       | RL11_LISMO   | rplK      | lmo0248 | 0.533                           | 0.424    |
| Q927L2      | 50S ribosomal protein L22                       | RL22_LISMO   | rplV      | lmo2627 | 0.510                           | 0.262    |
| Q8Y7R3      | Cobyric acid synthase                           | COBQ_LISMO   | cobQ      | lmo1208 | 0.455                           | 0.715    |
| P52331      | RNA polymerase sigma factor SigA                | SIGA_LISMO   | sigA      | lmo1454 | 0.286                           | 0.330    |
| Q93Q56      | Glutamate 5-kinase                              | PROB_LISMO   | proB      | lmo1260 | 0.234                           | 0.202    |
| Q8Y7A9      | Membrane protein insertase YidC 1               | YIDC1_LISMO  | yidC1     | lmo1379 | 0.202                           | 0.145    |
| P65110      | Translation initiation factor IF-1              | IF1_LISMO    | infA      | lmo2610 | 0.159                           | 0.208    |
| Q8Y496      | Autolysin, amidase                              | Q8Y496_LISMO | ami       | lmo2558 | 0.744                           | -        |
| Q8Y614      | Cell cycle protein GpsB                         | GPSB_LISMO   | gpsB      | lmo1888 | 0.110                           | -        |

**Table S1.** continued.

| Protein IDs | Name (recommend name)                                 | Entry Name | Gene name | Locus   | Fold change (log <sub>2</sub> ) |          |
|-------------|-------------------------------------------------------|------------|-----------|---------|---------------------------------|----------|
|             |                                                       |            |           |         | SA20_CTL                        | SA10_CTL |
| P58412      | Cell wall teichoic acid glycosylation protein<br>GtcA | GTCA_LISMO | gtcA      | lmo2549 | -                               | 0.429    |
| Q8Y4I2      | Phosphoglycerate kinase                               | PGK_LISMO  | pgk       | lmo2458 | -                               | 0.229    |

**Table S2.** The down-regulated proteins of *L. monocytogenes* after treatment with slightly acidic electrolyzed water in different chlorine concentrations. Note: SA20, 20 mg/L of SAEW; SA10, 10 mg/L of SAEW; CTL, control. The mark “#” is fold change ( $\log_2$ ) > -1,  $p < 0.05$ . The mark “\*” is the significant changes in different treatments ( $p < 0.05$ ). The mark “-” is  $p > 0.05$ .

| Protein IDs | Name (recommend name)                       | Entry Name  | Gene name | Locus   | Fold change ( $\log_2$ ) |                     |
|-------------|---------------------------------------------|-------------|-----------|---------|--------------------------|---------------------|
|             |                                             |             |           |         | SA20_CTL                 | SA10_CTL            |
| Q8Y6S5      | UPF0354 protein lmo1608                     | Y1608_LISMO | lmo1608   | lmo1608 | -2.435 <sup>#</sup>      | -1.980 <sup>#</sup> |
| Q92EP8      | Flotillin-like protein FloA                 | FLOA_LISMO  | floA      | lmo0392 | -2.204 <sup>#</sup>      | -1.793 <sup>#</sup> |
| Q8Y6Q3      | Anthranilate phosphoribosyltransferase      | TRPD_LISMO  | trpD      | lmo1631 | -1.814 <sup>#</sup>      | -1.309 <sup>#</sup> |
| Q9EYW9      | Glutamate decarboxylase beta                | DCEB_LISMO  | gadB      | lmo2363 | -1.029 <sup>#</sup>      | -0.830              |
| Q8Y754      | Glycine--tRNA ligase beta subunit           | SYGB_LISMO  | glyS      | lmo1458 | -1.015 <sup>#</sup>      | -1.126 <sup>#</sup> |
| Q8Y3T8      | Probable transaldolase 1                    | TAL1_LISMO  | tal1      | lmo2743 | -0.897                   | -0.765              |
| Q8Y8H5      | Sortase A                                   | SRTA_LISMO  | srtA      | lmo0929 | -0.724                   | -0.822              |
| Q8Y870      | GTP 3',8-cyclase                            | MOAA_LISMO  | moaA      | lmo1047 | -0.670                   | -0.706              |
| Q8Y6Z2      | Glycerol kinase                             | GLPK_LISMO  | glpK      | lmo1538 | -0.651                   | -0.473              |
| Q9XDA6      | Zinc uptake system ATP-binding protein ZurA | ZURA_LISMO  | zurA      | lmo1447 | -0.612                   | -0.640              |
| P0A485      | 50S ribosomal protein L31 type B            | RL31B_LISMO | rpmE2     | lmo2548 | -0.600                   | -0.558              |
| Q8Y551      | Fumarate hydratase class II                 | FUMC_LISMO  | fumC      | lmo2225 | -0.596                   | -0.406              |
| Q8Y6M6      | 30S ribosomal protein S2                    | RS2_LISMO   | rpsB      | lmo1658 | -0.587                   | -0.443              |
| Q8Y822      | GMP synthase [glutamine-hydrolyzing]        | GUAA_LISMO  | guaA      | lmo1096 | -0.568                   | -0.512              |
| Q8Y7T0      | Cobyrinate a,c-diamide synthase             | CBIA_LISMO  | cbiA      | lmo1191 | -0.557                   | -0.308              |
| Q8Y7A7      | Acylphosphatase                             | ACYP_LISMO  | acyP      | lmo1381 | -0.542                   | -0.466              |

**Table S2.** continued.

| Protein IDs | Name (recommend name)                                                 | Entry Name  | Gene name | Locus   | Fold change (log <sub>2</sub> ) |          |
|-------------|-----------------------------------------------------------------------|-------------|-----------|---------|---------------------------------|----------|
|             |                                                                       |             |           |         | SA20_CTL                        | SA10_CTL |
| Q8Y570      | Chaperone protein ClpB                                                | CLPB_LISMO  | clpB      | lmo2206 | -0.538                          | -0.458   |
| Q8Y4C0      | ATP synthase subunit alpha 2                                          | ATPA2_LISMO | atpA2     | lmo2531 | -0.526                          | -0.483   |
| P0A442      | Pyruvate formate-lyase-activating enzyme                              | PFLA_LISMO  | pflA      | lmo1407 | -0.524                          | -0.398   |
| Q8Y5Z6      | 4-hydroxy-tetrahydrodipicolinate reductase                            | DAPB_LISMO  | dapB      | lmo1907 | -0.507                          | -0.435   |
| Q8Y457      | tRNA pseudouridine synthase A                                         | TRUA_LISMO  | truA      | lmo2598 | -0.500                          | -0.503   |
| Q8Y5N8      | Isoleucine--tRNA ligase                                               | SYI_LISMO   | ileS      | lmo2019 | -0.499                          | -0.434   |
| Q8Y446      | 30S ribosomal protein S5                                              | RS5_LISMO   | rpsE      | lmo2615 | -0.472                          | -0.363   |
| Q8Y5L9      | UDP-N-acetylmuramoyl-L-alanyl-D-glutamate--2,6-diaminopimelate ligase | MURE_LISMO  | murE      | lmo2038 | -0.455                          | -0.371   |
| Q8Y640      | Peptide methionine sulfoxide reductase MsrA                           | MSRA_LISMO  | msrA      | lmo1860 | -0.451                          | -0.332   |
| Q8Y510      | ATP-dependent helicase/deoxyribonuclease subunit B                    | ADDB_LISMO  | addB      | lmo2268 | -0.446                          | -0.374   |
| Q92CZ4      | DNA-directed RNA polymerase subunit epsilon                           | RPOY_LISMO  | rpoY      | lmo1028 | -0.431                          | -0.379   |
| Q8YAF2      | Methionine--tRNA ligase                                               | SYM_LISMO   | metG      | lmo0177 | -0.424                          | -0.328   |
| Q92EH3      | Heme-degrading monooxygenase                                          | HDOX_LISMO  | isdG      | lmo0484 | -0.417                          | -0.469   |
| Q8YAB8      | Lysine--tRNA ligase                                                   | SYK_LISMO   | lysS      | lmo0228 | -0.415                          | -0.348   |
| Q8Y5M1      | UDP-N-acetylmuramoylalanine--D-glutamate ligase                       | MURD_LISMO  | murD      | lmo2036 | -0.411                          | -0.529   |
| Q8Y6K3      | 5-methyltetrahydropteroyltriglutamate--homocysteine methyltransferase | METE_LISMO  | metE      | lmo1681 | -0.407                          | -0.503   |



**Table S2.** continued.

| Protein IDs | Name (recommend name)                                  | Entry Name | Gene name | Locus   | Fold change (log <sub>2</sub> ) |          |
|-------------|--------------------------------------------------------|------------|-----------|---------|---------------------------------|----------|
|             |                                                        |            |           |         | SA20_CTL                        | SA10_CTL |
| P0A2X5      | Adenine phosphoribosyltransferase                      | APT_LISMO  | apt       | lmo1524 | -0.402                          | -0.444   |
| Q8Y511      | ATP-dependent helicase/nuclease subunit A              | ADDA_LISMO | addA      | lmo2267 | -0.401                          | -0.332   |
| Q8YAA4      | 50S ribosomal protein L1                               | RL1_LISMO  | rplA      | lmo0249 | -0.399                          | -0.412   |
| Q8YAB3      | Glutamate--tRNA ligase                                 | SYE_LISMO  | gltX      | lmo0237 | -0.382                          | -0.351   |
| Q8Y6D0      | DNA ligase                                             | DNLJ_LISMO | ligA      | lmo1758 | -0.373                          | -0.316   |
| Q8Y4H0      | Probable cell division protein WhiA                    | WHIA_LISMO | whiA      | lmo2472 | -0.368                          | -0.310   |
| Q8Y6X9      | Valine--tRNA ligase                                    | SYV_LISMO  | valS      | lmo1552 | -0.363                          | -0.300   |
| Q8Y757      | Probable manganese-dependent inorganic pyrophosphatase | PPAC_LISMO | ppaC      | lmo1448 | -0.360                          | -0.349   |
| Q8Y7C5      | Bifunctional protein FOLD                              | FOLD_LISMO | fold      | lmo1360 | -0.356                          | -0.348   |
| O31149      | Phosphoenolpyruvate-protein phosphotransferase         | PT1_LISMO  | ptsI      | lmo1003 | -0.347                          | -0.280   |
| Q8Y722      | Alanine--tRNA ligase                                   | SYA_LISMO  | alaS      | lmo1504 | -0.347                          | -0.315   |
| Q8Y449      | Adenylate kinase                                       | KAD_LISMO  | adk       | lmo2611 | -0.342                          | -0.359   |
| Q9RLT9      | DNA-directed RNA polymerase subunit beta               | RPOB_LISMO | rpoB      | lmo0258 | -0.340                          | -0.272   |
| Q8Y3U2      | NAD-dependent protein deacetylase                      | NPD_LISMO  | cobB      | lmo2739 | -0.336                          | -0.279   |
| Q93Q55      | Gamma-glutamyl phosphate reductase                     | PROA_LISMO | proA      | lmo1259 | -0.336                          | -0.286   |
| Q8Y6U8      | Thiol peroxidase                                       | TPX_LISMO  | tpx       | lmo1583 | -0.324                          | -0.275   |

**Table S2.** continued.

| Protein IDs | Name (recommend name)                                               | Entry Name  | Gene name | Locus   | Fold change (log <sub>2</sub> ) |          |
|-------------|---------------------------------------------------------------------|-------------|-----------|---------|---------------------------------|----------|
|             |                                                                     |             |           |         | SA20_CTL                        | SA10_CTL |
| Q8Y3X7      | Recombination protein RecR                                          | RECR_LISMO  | recR      | lmo2702 | -0.320                          | -0.402   |
| Q8Y6S8      | UDP-N-acetylmuramate--L-alanine ligase                              | MURC_LISMO  | murC      | lmo1605 | -0.317                          | -0.264   |
| Q8Y6X3      | Probable GTP-binding protein EngB                                   | ENGB_LISMO  | engB      | lmo1558 | -0.314                          | -0.273   |
| Q8Y3M5      | tRNA uridine 5-carboxymethylaminomethyl<br>modification enzyme MnmG | MNMG_LISMO  | mnmg      | lmo2810 | -0.312                          | -0.276   |
| Q8Y6D2      | Glutamyl-tRNA(Gln) amidotransferase<br>subunit A                    | GATA_LISMO  | gatA      | lmo1755 | -0.312                          | -0.276   |
| Q8Y564      | Uroporphyrinogen decarboxylase                                      | DCUP_LISMO  | hemE      | lmo2212 | -0.309                          | -0.364   |
| P66166      | 50S ribosomal protein L29                                           | RL29_LISMO  | rpmC      | lmo2624 | -0.302                          | -0.297   |
| Q8Y6Z5      | Probable transcriptional regulatory protein<br>lmo1535              | Y1535_LISMO | lmo1535   | lmo1535 | -0.302                          | -0.320   |
| Q8Y9N5      | Shikimate dehydrogenase (NADP(+))                                   | AROE_LISMO  | aroE      | lmo0490 | -0.302                          | -0.215   |
| Q8Y641      | Peptide methionine sulfoxide reductase MsrB                         | MSRB_LISMO  | msrB      | lmo1859 | -0.297                          | -0.333   |
| P0DJO8      | Motility gene repressor MogR                                        | MOGR_LISMO  | mogR      | lmo0674 | -0.293                          | -0.283   |
| Q8Y8D4      | D-alanine--D-alanyl carrier protein ligase                          | DLTA_LISMO  | dltA      | lmo0974 | -0.291                          | -0.170   |
| Q8YAW2      | Chromosomal replication initiator protein<br>DnaA                   | DNAA_LISMO  | dnaA      | lmo0001 | -0.291                          | -0.210   |
| Q8Y7G1      | DNA polymerase III PolC-type                                        | DPO3_LISMO  | polC      | lmo1320 | -0.289                          | -0.226   |
| P0DJO9      | Ribosomal protein L11 methyltransferase                             | PRMA_LISMO  | prmA      | lmo1471 | -0.287                          | -0.264   |
| P66699      | DNA-directed RNA polymerase subunit<br>alpha                        | RPOA_LISMO  | rpoA      | lmo2606 | -0.285                          | -0.232   |

**Table S2.** continued.

| Protein IDs | Name (recommend name)                                             | Entry Name  | Gene name | Locus   | Fold change (log <sub>2</sub> ) |          |
|-------------|-------------------------------------------------------------------|-------------|-----------|---------|---------------------------------|----------|
|             |                                                                   |             |           |         | SA20_CTL                        | SA10_CTL |
| Q8Y5E6      | Phosphoglucosamine mutase                                         | GLMM_LISMO  | glmM      | lmo2118 | -0.285                          | -0.241   |
| P0DJM1      | Chaperone protein DnaJ                                            | DNAJ_LISMO  | dnaJ      | lmo1472 | -0.284                          | -0.244   |
| P58668      | 4-hydroxy-3-methylbut-2-en-1-yl diphosphate synthase (flavodoxin) | ISPG_LISMO  | ispG      | lmo1441 | -0.283                          | -0.228   |
| Q8Y9J4      | UPF0237 protein lmo0533                                           | Y533_LISMO  | lmo0533   | lmo0533 | -0.275                          | -0.357   |
| Q8Y6D3      | Aspartyl/glutamyl-tRNA(Asn/Gln) amidotransferase subunit B        | GATB_LISMO  | gatB      | lmo1754 | -0.275                          | -0.195   |
| Q8Y577      | Tryptophan--tRNA ligase                                           | SYW_LISMO   | trpS      | lmo2198 | -0.273                          | -0.256   |
| Q8Y5V1      | Phosphopentomutase                                                | DEOB_LISMO  | deoB      | lmo1954 | -0.260                          | -0.274   |
| Q8Y915      | Glutamine--fructose-6-phosphate aminotransferase [isomerizing]    | GLMS_LISMO  | glmS      | lmo0727 | -0.246                          | -0.142   |
| Q8Y7I9      | S-ribosylhomocysteine lyase                                       | LUXS_LISMO  | luxS      | lmo1288 | -0.244                          | -0.162   |
| P47847      | Protein translocase subunit SecA 1                                | SECA1_LISMO | secA1     | lmo2510 | -0.244                          | -0.203   |
| Q8Y6W9      | Transcriptional repressor NrdR                                    | NRDR_LISMO  | nrdR      | lmo1562 | -0.238                          | -0.214   |
| P53434      | GTP cyclohydrolase 1 type 2 homolog                               | GCH1L_LISMO | lmo1452   | lmo1452 | -0.238                          | -0.264   |
| Q8Y441      | 50S ribosomal protein L23                                         | RL23_LISMO  | rplW      | lmo2630 | -0.237                          | -0.215   |
| Q8Y7F2      | Bifunctional riboflavin kinase/FMN adenylyltransferase            | RIBCF_LISMO | ribCF     | lmo1329 | -0.236                          | -0.198   |
| Q8Y7F1      | Polyribonucleotide nucleotidyltransferase                         | PNP_LISMO   | pnp       | lmo1331 | -0.232                          | -0.190   |
| Q8Y7G2      | Proline--tRNA ligase                                              | SYP_LISMO   | proS      | lmo1319 | -0.229                          | -0.184   |

**Table S2.** continued.

| Protein IDs | Name (recommend name)                                            | Entry Name   | Gene name | Locus   | Fold change (log <sub>2</sub> ) |          |
|-------------|------------------------------------------------------------------|--------------|-----------|---------|---------------------------------|----------|
|             |                                                                  |              |           |         | SA20_CTL                        | SA10_CTL |
| Q8Y4H1      | NADPH dehydrogenase                                              | NAMA_LISMO   | namA      | lmo2471 | -0.228                          | -0.210   |
| Q8Y421      | Elongation factor G                                              | EFG_LISMO    | fusA      | lmo2654 | -0.227                          | -0.183   |
| Q8Y793      | Putative competence-damage inducible protein                     | CINA_LISMO   | cinA      | lmo1397 | -0.227                          | -0.245   |
| Q8Y6Y4      | Cell shape-determining protein MreC                              | MREC_LISMO   | mreC      | lmo1547 | -0.226                          | -0.268   |
| Q7AP68      | OpuCD protein                                                    | Q7AP68_LISMO | opuCD     | lmo1425 | -0.221                          | -0.277   |
| Q8Y4A7      | Thymidine kinase                                                 | KITH_LISMO   | tdk       | lmo2544 | -0.219                          | -0.215   |
| Q8YAD4      | Bifunctional protein GlmU                                        | GLMU_LISMO   | glmU      | lmo0198 | -0.212                          | -0.146   |
| Q8Y7A3      | DNA translocase FtsK                                             | FTSK_LISMO   | ftsK      | lmo1386 | -0.211                          | -0.140   |
| Q9AGE7      | Co-chaperonin GroES                                              | CH10_LISMO   | groES     | lmo2069 | -0.211                          | -0.281   |
| Q8Y6B1      | Peptidase T                                                      | PEPT_LISMO   | pepT      | lmo1780 | -0.206                          | -0.152   |
| Q8Y8A0      | N-acetyldiaminopimelate deacetylase                              | DAPEL_LISMO  | lmo1012   | lmo1012 | -0.201                          | -0.191   |
| Q8Y676      | Methionyl-tRNA formyltransferase                                 | FMT_LISMO    | fnt       | lmo1823 | -0.194                          | -0.178   |
| Q8Y6V9      | Acetyl-coenzyme A carboxylase carboxyl transferase subunit alpha | ACCA_LISMO   | accA      | lmo1572 | -0.187                          | -0.198   |
| Q8YAE0      | Carbohydrate deacetylase                                         | YDJC_LISMO   | lmo0191   | lmo0191 | -0.185                          | -0.237   |
| P0DJM2      | Chaperone protein DnaK                                           | DNAK_LISMO   | dnaK      | lmo1473 | -0.183                          | -0.217   |
| Q8Y7N6      | Ribonuclease PH                                                  | RNPH_LISMO   | rph       | lmo1238 | -0.183                          | -0.223   |
| P0DJP3      | Protein translocase subunit SecA 2                               | SECA2_LISMO  | secA2     | lmo0583 | -0.182                          | -0.127   |

**Table S2.** continued.

| Protein IDs | Name (recommend name)                           | Entry Name  | Gene name | Locus   | Fold change (log <sub>2</sub> ) |          |
|-------------|-------------------------------------------------|-------------|-----------|---------|---------------------------------|----------|
|             |                                                 |             |           |         | SA20_CTL                        | SA10_CTL |
| Q8Y5L7      | Ribosomal RNA small subunit methyltransferase H | RSMH_LISMO  | rsmH      | lmo2041 | -0.177                          | -0.167   |
| Q8Y7P1      | Endonuclease MutS2                              | MUTS2_LISMO | mutS2     | lmo1232 | -0.170                          | -0.167   |
| Q8Y5T8      | Uncharacterized protein Lmo1967                 | Y1967_LISMO | lmo1967   | lmo1967 | -0.167                          | -0.144   |
| Q8Y7G3      | Putative zinc metalloprotease Lmo1318           | Y1318_LISMO | lmo1318   | lmo1318 | -0.165                          | -0.135   |
| Q8Y755      | DEAD-box ATP-dependent RNA helicase CshB        | CSHB_LISMO  | cshB      | lmo1450 | -0.164                          | -0.157   |
| Q8Y7Q1      | Phenylalanine--tRNA ligase beta subunit         | SYFB_LISMO  | pheT      | lmo1222 | -0.151                          | -0.107   |
| Q8Y6X8      | Glutamate-1-semialdehyde 2,1-aminomutase 1      | GSA1_LISMO  | hemL1     | lmo1553 | -0.144                          | -0.110   |
| Q8YAR1      | Adenylosuccinate synthetase                     | PURA_LISMO  | purA      | lmo0055 | -0.138                          | -0.174   |
| Q8Y756      | Probable endonuclease 4                         | END4_LISMO  | nfo       | lmo1449 | -0.135                          | -0.116   |
| Q8Y493      | Arginine--tRNA ligase                           | SYR_LISMO   | argS      | lmo2561 | -0.134                          | -0.071   |
| Q8Y664      | Carbamoyl-phosphate synthase small chain        | CARA_LISMO  | carA      | lmo1836 | -0.131                          | -0.154   |
| Q8Y8V6      | FMN-dependent NADH:quinone oxidoreductase 2     | AZOR2_LISMO | azoR2     | lmo0786 | -0.114                          | -0.129   |
| Q8Y6D6      | Uncharacterized RNA methyltransferase lmo1751   | Y1751_LISMO | lmo1751   | lmo1751 | -0.111                          | -0.073   |
| Q8Y3T4      | Serine--tRNA ligase                             | SYS_LISMO   | serS      | lmo2747 | -0.086                          | -0.093   |
| Q8Y4B8      | ATP synthase subunit b                          | ATPF_LISMO  | atpF      | lmo2533 | -0.083                          | -0.117   |
| Q8Y7C3      | Exodeoxyribonuclease 7 small subunit            | EX7S_LISMO  | xseB      | lmo1362 | -0.546                          | -0.462*  |

**Table S2.** continued.

| Protein IDs | Name (recommend name)                                                   | Entry Name  | Gene name | Locus   | Fold change (log <sub>2</sub> ) |          |
|-------------|-------------------------------------------------------------------------|-------------|-----------|---------|---------------------------------|----------|
|             |                                                                         |             |           |         | SA20_CTL                        | SA10_CTL |
| Q8Y3S3      | Macro domain-containing protein lmo2759                                 | Y2759_LISMO | lmo2759   | lmo2759 | -0.425                          | -0.339*  |
| Q8Y4R7      | Glucose-6-phosphate isomerase                                           | G6PI_LISMO  | pgi       | lmo2367 | -0.310                          | -0.179*  |
| Q8Y709      | Aspartate--tRNA ligase                                                  | SYD_LISMO   | aspS      | lmo1519 | -0.283                          | -0.223*  |
| Q8Y4F5      | UvrABC system protein B                                                 | UVRB_LISMO  | uvrB      | lmo2489 | -0.249                          | -0.191*  |
| P0DJP2      | Ribonuclease Y                                                          | RNY_LISMO   | rny       | lmo1399 | -0.231                          | -0.184*  |
| Q8Y6T8      | Septation ring formation regulator EzrA                                 | EZRA_LISMO  | ezrA      | lmo1594 | -0.215                          | -0.151*  |
| Q8YA96      | DNA-directed RNA polymerase subunit beta'                               | RPOC_LISMO  | rpoC      | lmo0259 | -0.205                          | -0.149*  |
| Q8Y6H7      | UPF0435 protein lmo1707                                                 | Y1707_LISMO | lmo1707   | lmo1707 | -0.149                          | -0.236*  |
| Q8Y789      | DNA mismatch repair protein MutS                                        | MUTS_LISMO  | mutS      | lmo1403 | -0.143                          | -0.074*  |
| Q8Y6K9      | 2-succinyl-5-enolpyruvyl-6-hydroxy-3-cyclohexene-1-carboxylate synthase | MEND_LISMO  | menD      | lmo1675 | -0.129                          | -0.078*  |
| Q8Y7H5      | UPF0291 protein lmo1304                                                 | Y1304_LISMO | lmo1304   | lmo1304 | -0.186*                         | -        |
| Q8Y6Q5      | N-(5'-phosphoribosyl)anthranilate isomerase                             | TRPF_LISMO  | trpF      | lmo1629 | -                               | -0.288*  |

**Table S3.** Functional enrichment analysis on KEGG pathway of the DEPs of *L. monocytogenes* after treatment with SAEW.

| Functional characterization | KEGG pathway                                       | Up-regulated                                                                                                      | Down-regulated                                                                                                                                                                                                                                                                              |
|-----------------------------|----------------------------------------------------|-------------------------------------------------------------------------------------------------------------------|---------------------------------------------------------------------------------------------------------------------------------------------------------------------------------------------------------------------------------------------------------------------------------------------|
| <b>Metabolism</b>           |                                                    |                                                                                                                   |                                                                                                                                                                                                                                                                                             |
| Global and overview maps    | 01100 Metabolic pathways                           | aroA, thiM, pgk <sup>1</sup> , proB, ndk, tmk, cmk, mtnN, mgsA, ispF, lmo2564, ddl, purD, acpP, atpD2, cobQ, purQ | proA, adk, metG, cbiA, lmo1012, dapB, folD, murC, gatA, luxS, metE, acyP, murD, gatB, gltX, fnt, gadB, murE, menD, ribCF, tal1, hemE, purA, dltA, cobB, apt, fumC, guaA, glmM, trpD, pgi, carA, ispG, glmS, trpF <sup>1</sup> , accA, moaA, tdk, deoB, atpF, cinA, glpK, hemL1, atpA2, glmU |
|                             | 01110 Biosynthesis of secondary metabolites        | aroA, pgk <sup>1</sup> , proB, ndk, ispF, purD, acpP, purQ                                                        | proA, trpF <sup>1</sup> , dapB, hemL1, metE, accA, tal1, menD, trpD, ispG, adk, lmo1012, gadB, isdG, hemE, ribCF, fumC, pgi                                                                                                                                                                 |
|                             | 01120 Microbial metabolism in diverse environments | pgk <sup>1</sup> , mgsA, lmo2564                                                                                  | dapB, tal1, folD, acyP, gadB, fumC, pgi, hemL1, accA                                                                                                                                                                                                                                        |
|                             | 01200 Carbon metabolism                            | pgk <sup>1</sup>                                                                                                  | tal1, folD, fumC, pgi, accA                                                                                                                                                                                                                                                                 |
|                             | 01212 Fatty acid metabolism                        | -                                                                                                                 | accA                                                                                                                                                                                                                                                                                        |
|                             | 01230 Biosynthesis of amino acids                  | aroA, pgk <sup>1</sup> , proB, mtnN                                                                               | proA, dapB, metE, tal1, trpD, trpF <sup>1</sup> , lmo1012, luxS                                                                                                                                                                                                                             |
|                             | 01232 Nucleotide metabolism                        | ndk, tmk, cmk                                                                                                     | apt, tdk, adk, purA, guaA                                                                                                                                                                                                                                                                   |
|                             | 01250 Biosynthesis of nucleotide sugars            | -                                                                                                                 | glmS, pgi, glmM, glmU                                                                                                                                                                                                                                                                       |
|                             | 01240 Biosynthesis of cofactors                    | thiM, ndk, cobQ                                                                                                   | adk, folD, hemE, hemL1, purA,, carA, cbiA, menD, moaA, gltX, ribCF                                                                                                                                                                                                                          |
|                             | 01220 Degradation of aromatic compounds            | lmo2564                                                                                                           | -                                                                                                                                                                                                                                                                                           |
|                             | 00010 Glycolysis/ Gluconeogenesis                  | pgk <sup>1</sup>                                                                                                  | pgi                                                                                                                                                                                                                                                                                         |
|                             | 00020 Citrate cycle (TCA cycle)                    | -                                                                                                                 | fumC                                                                                                                                                                                                                                                                                        |
|                             | 00030 Pentose phosphate pathway                    | -                                                                                                                 | tal1, pgi, deoB                                                                                                                                                                                                                                                                             |
|                             | 00500 Starch and sucrose metabolism                | -                                                                                                                 | pgi                                                                                                                                                                                                                                                                                         |
| Carbohydrate metabolism     |                                                    |                                                                                                                   |                                                                                                                                                                                                                                                                                             |

|                                    |                                                           |                  |                            |
|------------------------------------|-----------------------------------------------------------|------------------|----------------------------|
| Energy metabolism                  | 00520 Amino sugar and nucleotide sugar metabolism         | -                | glmS, pgI, glmM, glmU      |
|                                    | 00620 Pyruvate metabolism                                 | -                | acyP, fumC, accA           |
|                                    | 00640 Propanoate metabolism                               | mgsA             | accA                       |
|                                    | 00650 Butanoate metabolism                                | -                | gadB                       |
|                                    | 00190 Oxidative phosphorylation                           | atpD2, ppaX      | atpF, atpA2, ppaC          |
|                                    | 00195 Photosynthesis                                      | atpD2            | atpF, atpA2                |
|                                    | 00720 Carbon fixation pathways in prokaryotes             | -                | folD, fumC, accA           |
| Lipid metabolism                   | 00710 Carbon fixation in photosynthetic organisms         | pgk <sup>1</sup> | -                          |
|                                    | 00061 Fatty acid biosynthesis                             | -                | accA                       |
| Nucleotide metabolism              | 00561 Glycerolipid metabolism                             | -                | glpK                       |
|                                    | 00230 Purine metabolism                                   | ndk, purD, purQ  | apt, adk, deoB, purA, guaA |
| Amino acid metabolism              | 00240 Pyrimidine metabolism                               | ngk, tmk, cmk    | tdk, carA                  |
|                                    | 00250 Alanine, aspartate and glutamate metabolism         | purQ             | glmS, gadB, purA, carA     |
|                                    | 00270 Cysteine and methionine metabolism                  | mtnN             | metE, luxS                 |
|                                    | 00300 Lysine biosynthesis                                 | -                | dapB, murE, lmo1012        |
|                                    | 00330 Arginine and proline metabolism                     | proB             | proA                       |
| Metabolism of other amino acids    | 00400 Phenylalanine, tyrosine and tryptophan biosynthesis | aroA             | trpD, trpF <sup>1</sup>    |
|                                    | 00270 Cysteine and methionine metabolism                  | mtnN             | -                          |
|                                    | 00410 beta-Alanine metabolism                             | -                | gadB                       |
|                                    | 00430 Taurine and hypotaurine metabolism                  | -                | gadB                       |
|                                    | 00450 Selenocompound metabolism                           | -                | metE, metG                 |
| Glycan biosynthesis and metabolism | 00470 D-Amino acid metabolism                             | ddl, purQ        | murD, dltA                 |
|                                    | 00541 O-Antigen nucleotide sugar biosynthesis             | -                | glmU                       |
|                                    | 00550 Peptidoglycan biosynthesis                          | ddl              | murC, murD, murE           |



|                                             |                                                           |         |                         |
|---------------------------------------------|-----------------------------------------------------------|---------|-------------------------|
| Metabolism of cofactors and vitamins        | 00552 Teichoic acid biosynthesis                          | -       | dtlA                    |
|                                             | 00730 Thigpsne metabolism                                 | thiM    | adk                     |
|                                             | 00740 Riboflavin metabolism                               | thiM    | ribCF                   |
|                                             | 00760 Nicotinate and nicotinamide metabolism              | -       | cinA, cobB              |
|                                             | 00790 Folate biosynthesis                                 | -       | moaA                    |
|                                             | 00670 One carbon pool by folate                           | -       | fmt, folD               |
|                                             | 00860 Porphyrin metabolism                                | cobQ    | hemE, hemL1, chiA, isdG |
| Metabolism of terpenoids and polyketides    | 00130 Ubiquinone and other terpenoid-quinone biosynthesis | -       | menD                    |
|                                             | 00900 Terpenoid backbone biosynthesis                     | ispF    | ispG                    |
|                                             | 00332 Carbapenem biosynthesis                             | proB    | proA                    |
| Biosynthesis of other secondary metabolites | 00261 Monobactam biosynthesis                             | -       | dapB                    |
|                                             | 00998 Biosynthesis of various antibiotics                 | acpP    | -                       |
| Xenobiotics biodegradation and metabolism   | 00627 Aminobenzoate degradation                           | -       | acyP                    |
|                                             | 00983 Drug metabolism - other enzymes                     | ndk     | tdk, guaA               |
|                                             | 00362 Benzoate degradation                                | lmo2564 | -                       |
|                                             | 00622 Xylene degradation                                  | lmo2564 | -                       |
|                                             | 00621 Dioxin degradation                                  | lmo2564 | -                       |

---

### Genetic information processing

---

|               |                                   |                                                                                                                        |                                                                                               |
|---------------|-----------------------------------|------------------------------------------------------------------------------------------------------------------------|-----------------------------------------------------------------------------------------------|
| Transcription | 03020 RNA polymerase              | -                                                                                                                      | rpoA, rpoB, rpoC                                                                              |
| Translation   | 03010 Ribosome                    | rplK, rplM, rplO, rplQ, rplR, rplB, rplT, rplV, rplX, rpmD, rpmI, rplD, rplE, rplI, rpsJ, rpsK, rpsM, rpsZ, rpsS, rpsD | rplA, rplW, rpmC, rpmE2, rpsB, rprE                                                           |
|               | 00970 Aminoacyl-tRNA biosynthesis | thrS, glyQ, hisS                                                                                                       | fmt, trpS, ileS, alaS, valS, metG, serS, aspS, glyS, proS, argS, pheT, gatA, gatB, lysS, gltX |

|                                             |                                            |                  |                               |
|---------------------------------------------|--------------------------------------------|------------------|-------------------------------|
| Folding, sorting and degradation            | 03060 Protein export                       | yidC1            | secA2                         |
|                                             | 04122 Sulfur relay system                  | -                | moaA                          |
|                                             | 03018 RNA degradation                      | -                | pnp, dnaK, rny                |
| Replication and repair                      | 03030 DNA replication                      | ssb1             | ligA, polC                    |
|                                             | 03410 Base excision repair                 | -                | nfo, ligA                     |
|                                             | 03420 Nucleotide excision repair           | -                | ligA, uvrB                    |
|                                             | 03430 Mismatch repair                      | ssb1, mutL       | ligA, mutS, xseB, polC, mutS2 |
|                                             | 03440 Homologous recombination             | ssb1             | polC, recR                    |
| <b>Environmental Information Processing</b> |                                            |                  |                               |
| Membrane transport                          | 02010 ABC transporters                     | efcA1, mntA      | opuCD, zurA                   |
|                                             | 02060 Phosphotransferase system (PTS)      | -                | ptsI                          |
|                                             | 03070 Bacterial secretion system           | yidC1            | secA2                         |
| Signal transduction                         | 02020 Two-component system                 | -                | dnaA, dltA                    |
|                                             | 04013 MAPK signaling pathway – fly         | sodA             | -                             |
|                                             | 04016 MAPK signaling pathway – plant       | ndk              | -                             |
|                                             | 04066 HIF-1 signaling pathway              | pgk <sup>1</sup> | -                             |
|                                             | 04068 FoxO signaling pathway               | sodA             | -                             |
| <b>Cellular processes</b>                   |                                            |                  |                               |
| Cell growth and death                       | 04112 Cell cycle - Caulobacter             | -                | dnaA, lmo1318                 |
| Cellular community - prokaryotes            | 02024 Quorum sensing                       | yidC1            | gadB, secA2, luxS             |
|                                             | 05111 Biofilm formation - Vibrio cholerae  | -                | luxS                          |
|                                             | 02026 Biofilm formation - Escherichia coli | -                | luxS                          |
| Transport and catabolism                    | 04146 Peroxisome                           | sodA             | -                             |
| Cell motility                               | 02040 Flagellar assembly                   | sigA             | -                             |
| <b>Organismal systems</b>                   |                                            |                  |                               |
| Endocrine system                            | 03320 PPAR signaling pathway               | -                | glpK                          |
| Nervous system                              | 04727 GABAergic synapse                    | -                | gadB                          |
| Aging                                       | 04211 Longevity regulating pathway         | sodA             | -                             |
|                                             | 04212 Longevity regulating pathway - worm  | sodA             | dnaK                          |

|                                 |                                                         |      |      |
|---------------------------------|---------------------------------------------------------|------|------|
|                                 | 04213 Longevity regulating pathway - multiple species   | sodA | clpB |
| Environmental adaption          | 04626 Plant-pathogen interaction                        | -    | glpK |
| <b>Human diseases</b>           |                                                         |      |      |
| Cancer: overview                | 05200 Pathways in cancer                                | -    | fumC |
|                                 | 05208 Chemical carcinogenesis - reactive oxygen species | sodA | -    |
| Cancer: specific types          | 05211 Renal cell carcinoma                              | -    | fumC |
| Infectious disease: bacterial   | 05150 Staphylococcus aureus infection                   | -    | dltA |
|                                 | 05152 Tuberculosis                                      | -    | dnaK |
| Neurodegenerative disease       | 05016 Huntington disease                                | sodA | -    |
| Cardiovascular disease          | 05415 Diabetic cardiomyopathy                           | -    | glmS |
|                                 | 05417 Lipid and atherosclerosis                         | sodA | -    |
| Endocrine and metabolic disease | 04940 Type I diabetes mellitus                          |      | gadB |
|                                 | 04931 Insulin resistance                                |      | glmS |
|                                 | 04934 Cushing syndrome                                  |      | fumC |
| Drug resistance: antimicrobial  | 01502 Vancomycin resistance                             | ddl  | -    |
|                                 | 01503 Cationic antimicrobial peptide (CAMP) resistance  | -    | dltA |

<sup>1</sup>, upregulated by low dose SA treatment (SA10 group)

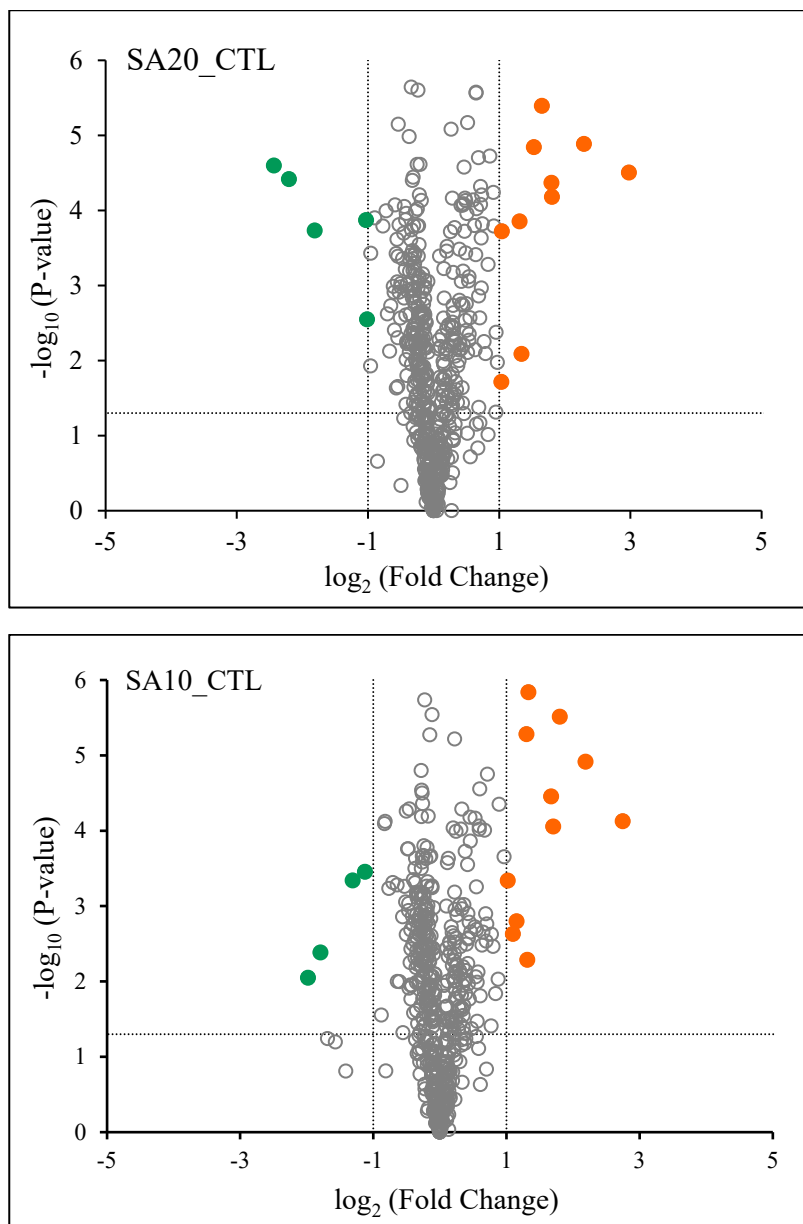

**Figure S1.** Volcano plot of significant differential expressed proteins (sDEPs) between various treatments of SAEW in *L. monocytogenes*. Note: SA20, 20 mg/L of ACC in SAEW; SA10, 10 mg/L of ACC in SAEW; CTL, control. The orange dots and green dots are significant up and down regulated, respectively. The dash line of x-axis on the left and right side respectively are Fold change = -2 and 2. The dash line in y-axis is P-value = 0.05.

tuf,Y130

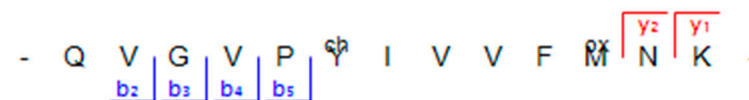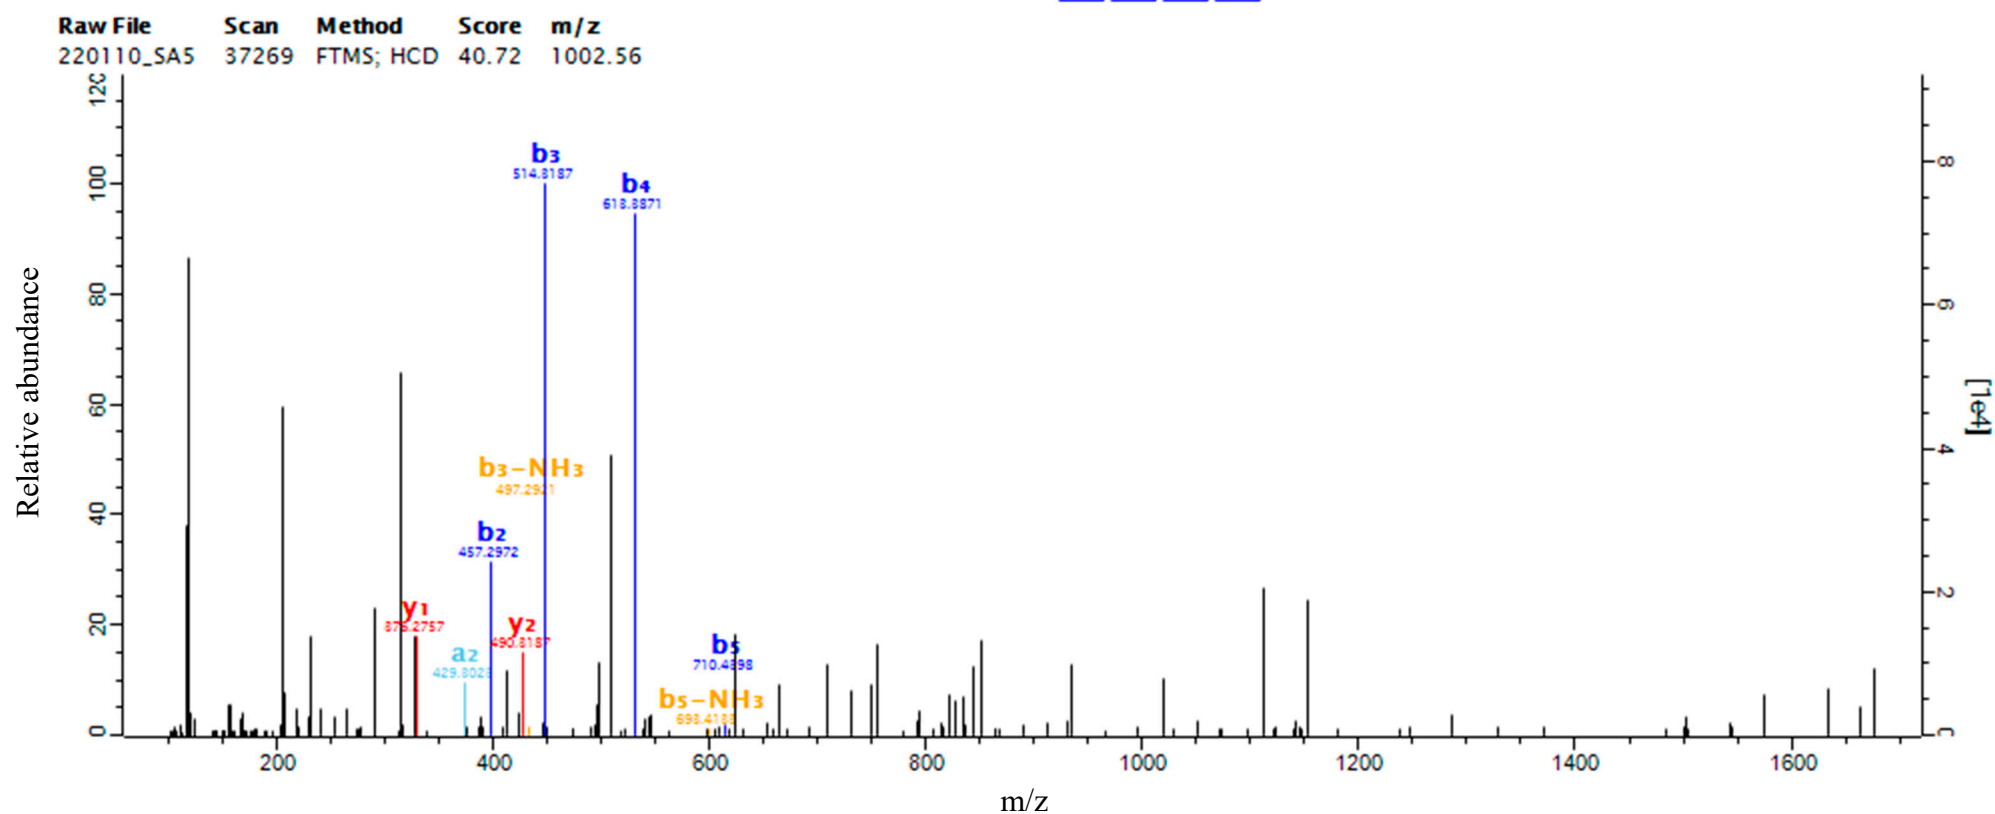

**Figure S2.** The high energy collision dissociation (HCD) mass spectrum of the chlorinated peptide QVGVP<sup>130</sup>Y<sup>Cl</sup>IVVFMNK at m/z 1002.56.

tuf,Y161

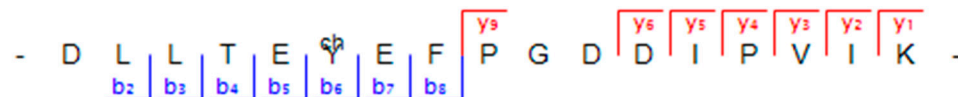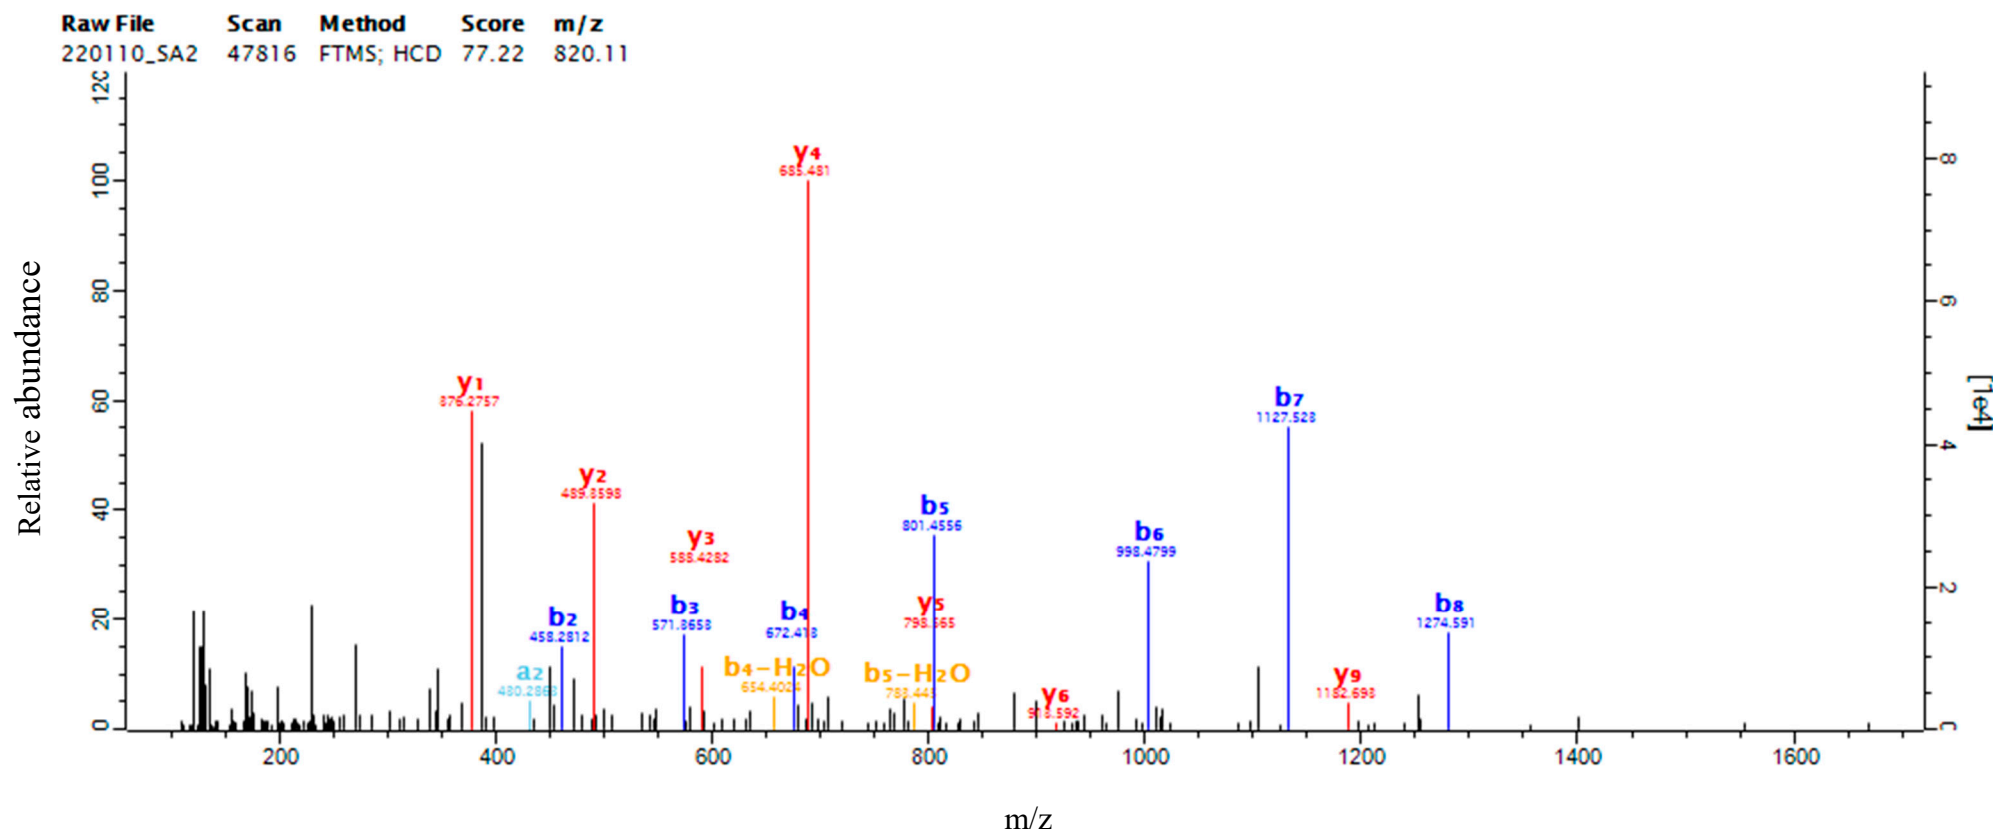

**Figure S3.** The high energy collision dissociation (HCD) mass spectrum of the chlorinated peptide DLLTE<sup>161</sup>Y<sup>Cl</sup>EFGDDIPVIK at m/z 820.11.

tuf,Y269

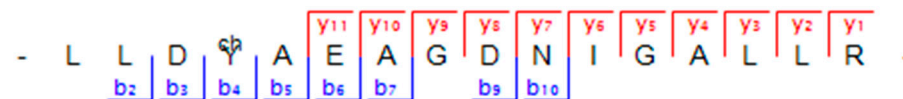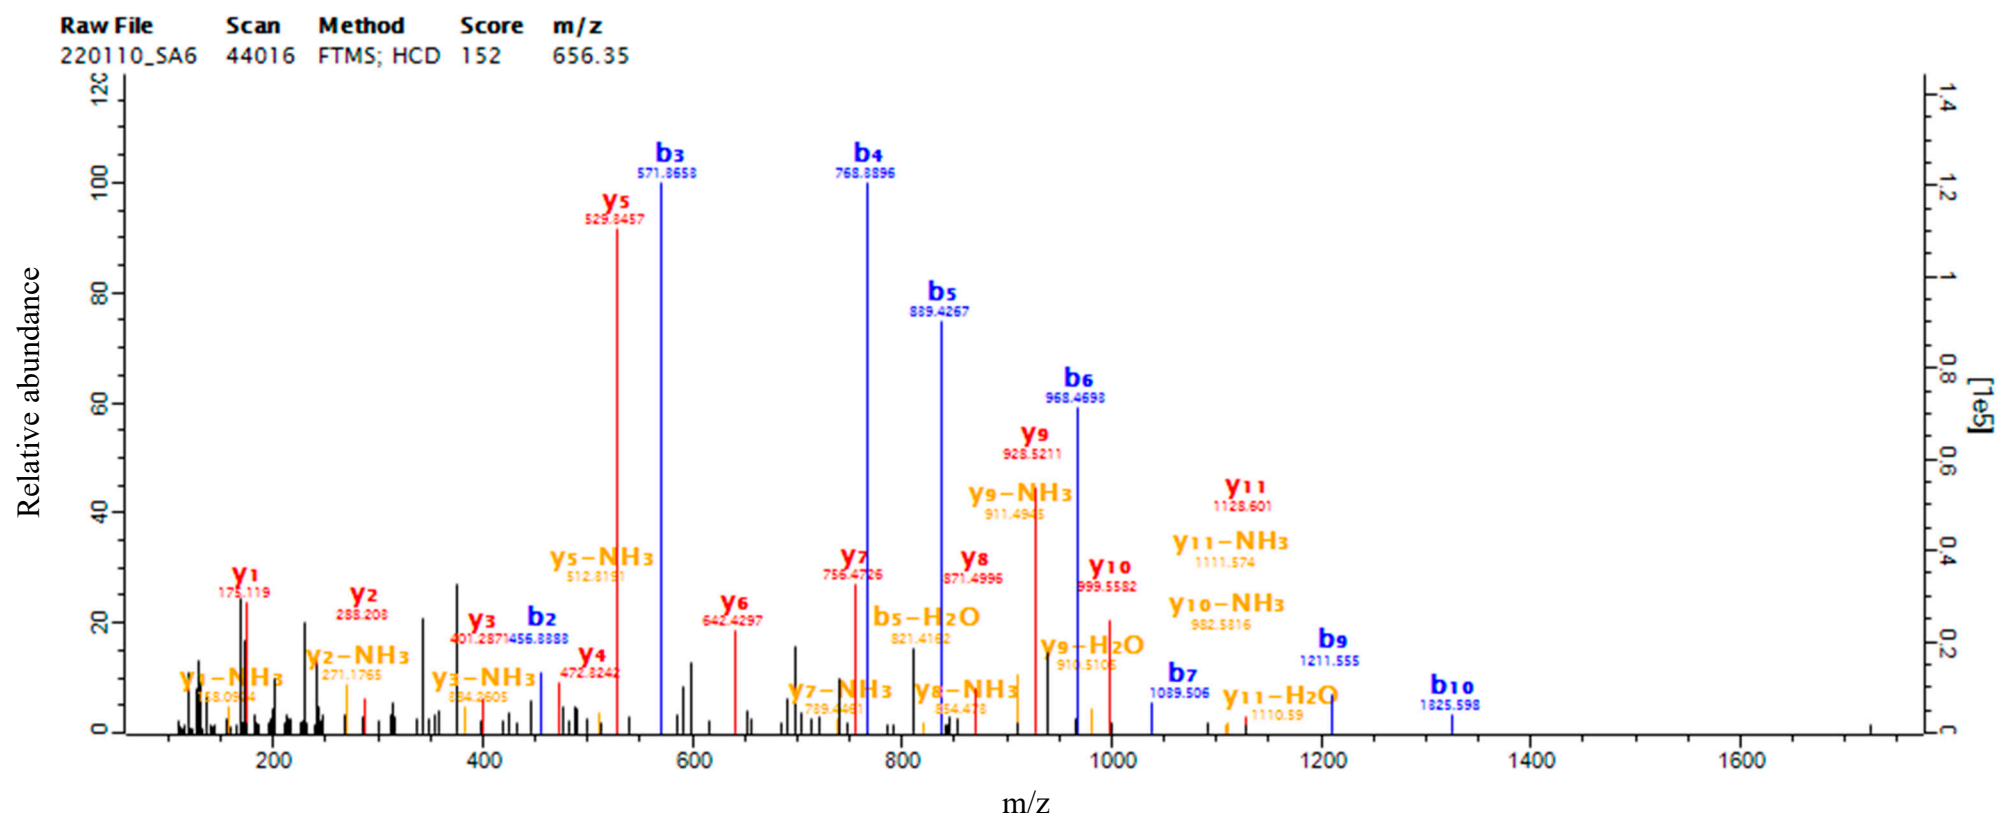

**Figure S4.** The high energy collision dissociation (HCD) mass spectrum of the chlorinated peptide LLD<sup>269</sup>Y<sup>Cl</sup>AEAGDNIGALLR at m/z 656.35.

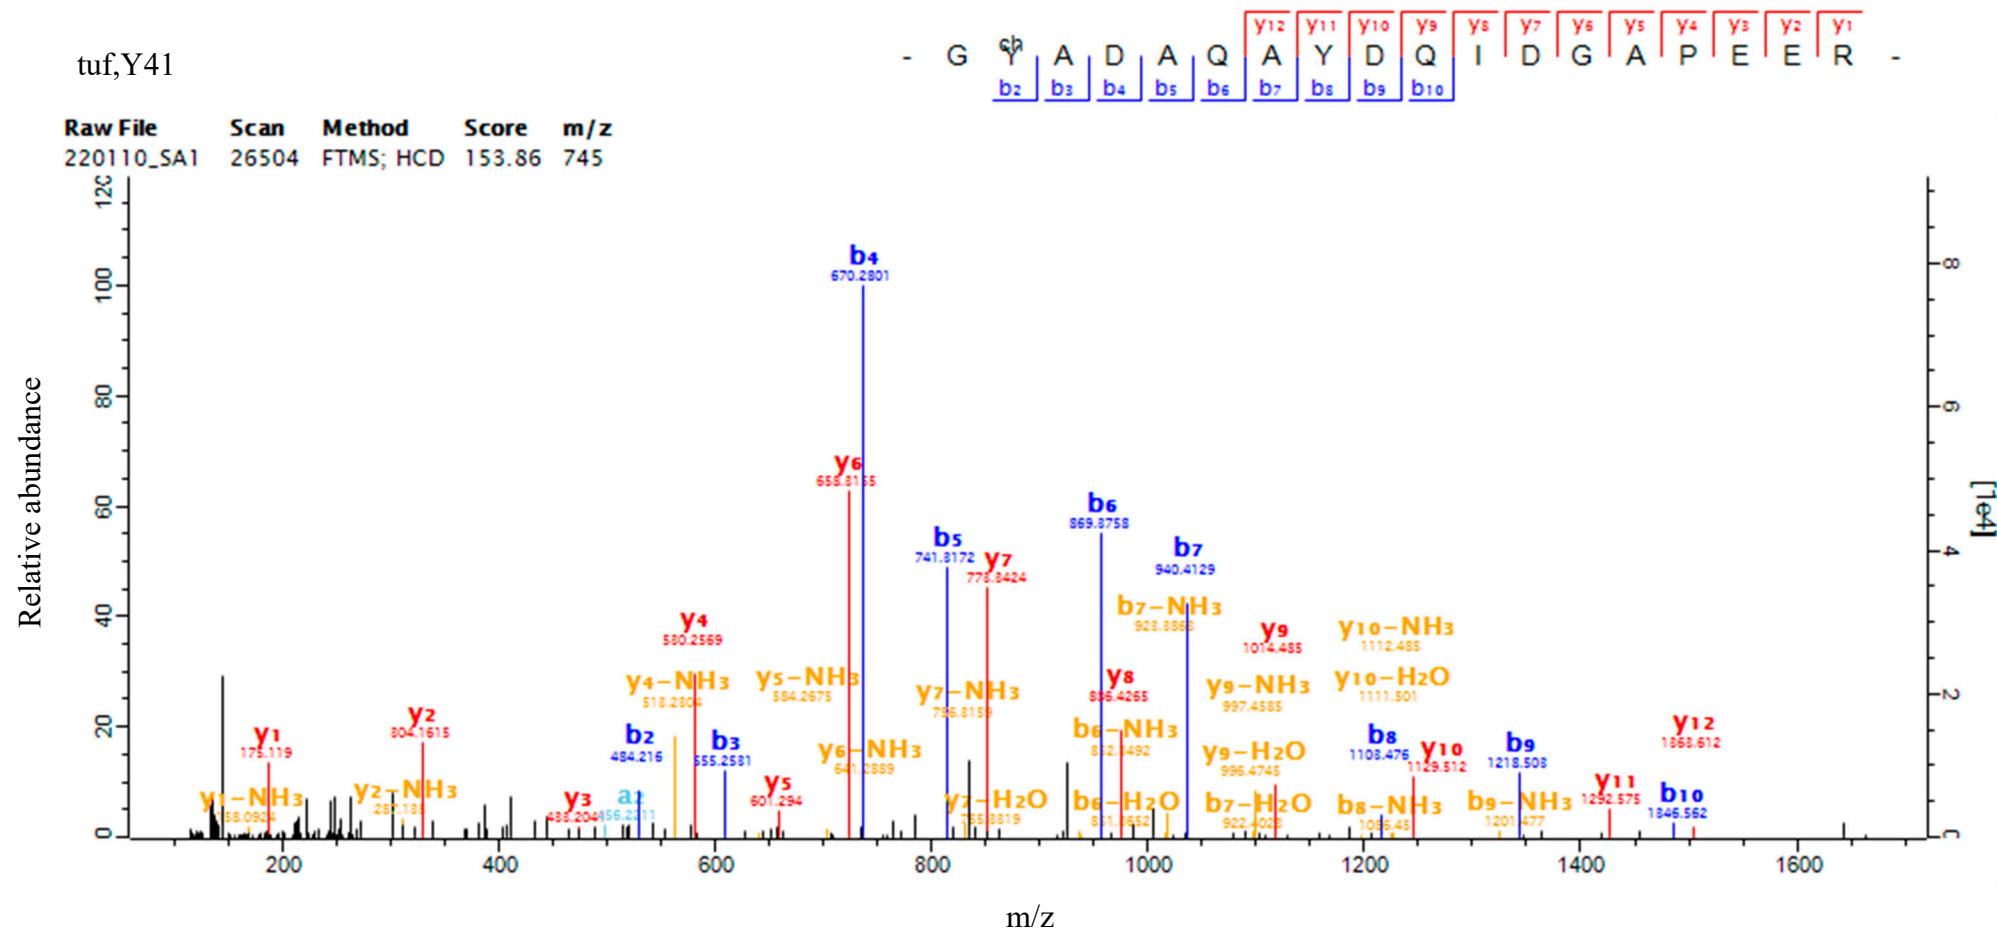

**Figure S5.** The high energy collision dissociation (HCD) mass spectrum of the chlorinated peptide G<sup>41</sup>Y<sup>Cl</sup>ADAQAYDQIDGAPEER at m/z 745.



tuf,Y88

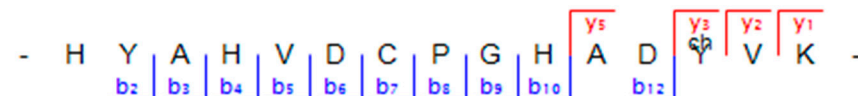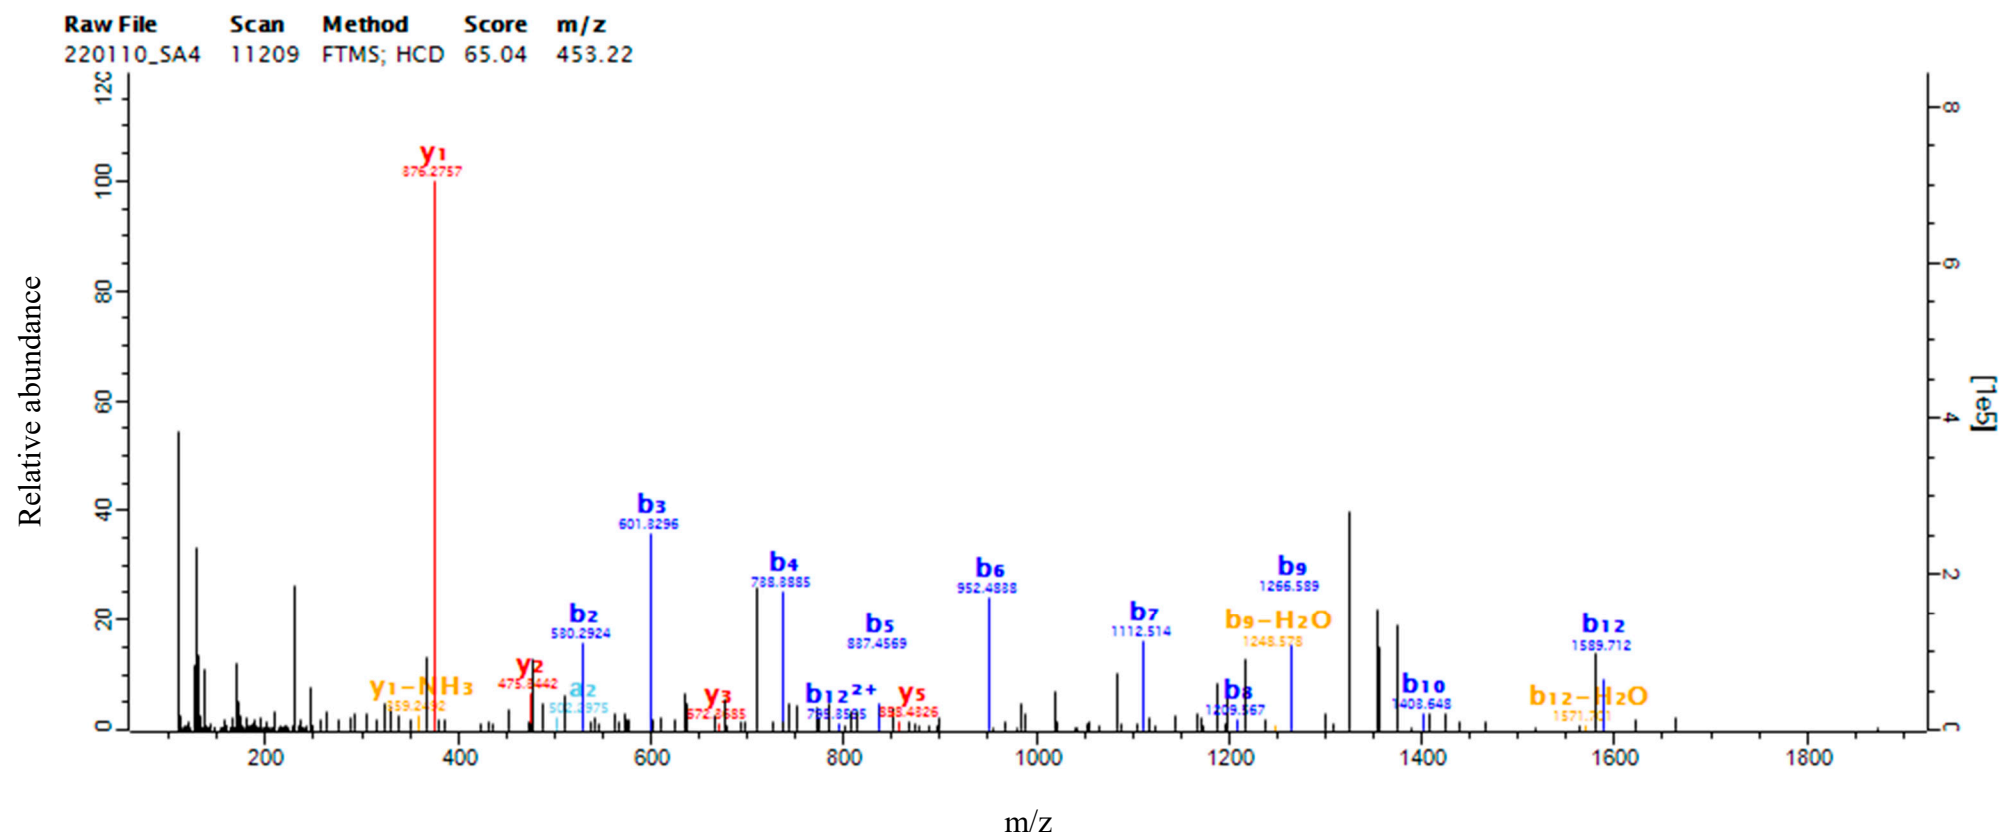

**Figure S6.** The high energy collision dissociation (HCD) mass spectrum of the chlorinated peptide HYAHVDCPGHAD<sup>88</sup>YClVK at m/z 453.22.

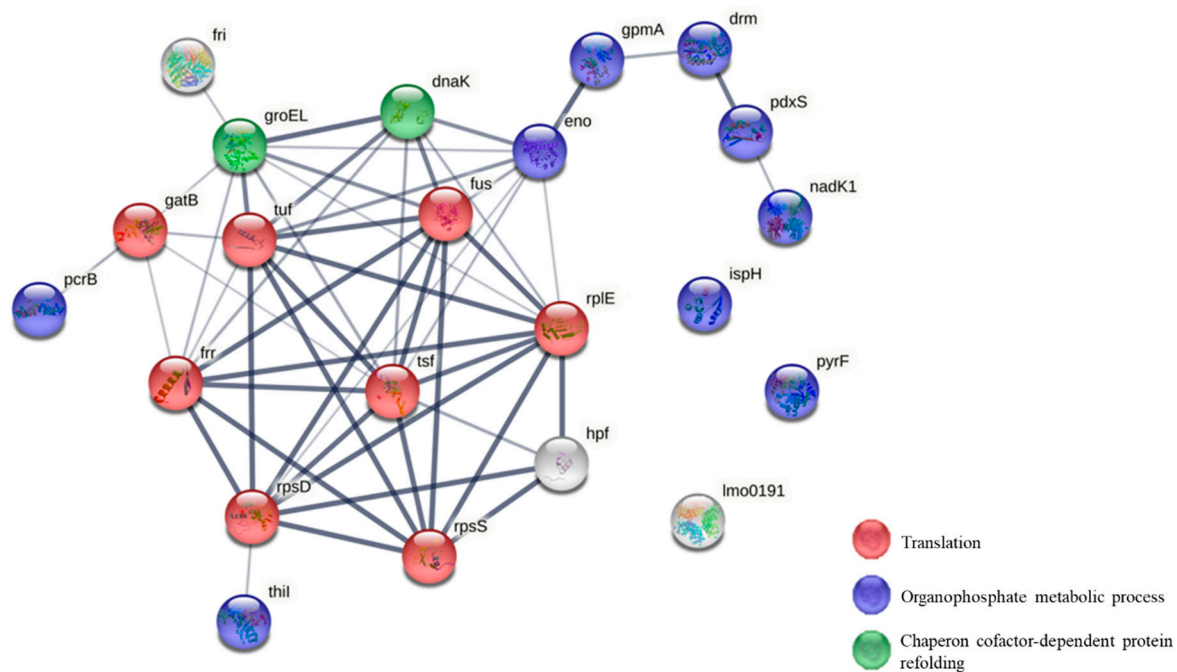

**Figure S7.** Protein-protein interaction of chlorination proteins in *L. monocytogenes*. Functional categorization was conducted based on Gene Ontology (GO) level and STRING Protein-Protein Interaction Networks. The average node degree is 3.88 and the average local clustering coefficient is 0.579.
